# Supplementary material for: A bone-specific adipogenesis pathway in fat-free mice defines key origins and adaptations of bone marrow adipocytes with age and disease
Source: eLife. 2021 Aug 11;10:e66275. doi: 10.7554/eLife.66275 (PMC8412938; doi:10.7554/eLife.66275)
Supplement: Figure 1—source data 1. [file elife-66275-fig1-data1.xlsx]

## Sheet: Fig 1
Figure 1-Source Data 1
Panel B: % Total Colonies
	GFP	RFP	Mixed
Mouse 1	90.1	6.2	3.7
Mouse 2	76	20	4
Mouse 3	73.3	23.3	3.3
