# Supplementary material for: A bone-specific adipogenesis pathway in fat-free mice defines key origins and adaptations of bone marrow adipocytes with age and disease
Source: eLife. 2021 Aug 11;10:e66275. doi: 10.7554/eLife.66275 (PMC8412938; doi:10.7554/eLife.66275)
Supplement: Figure 2—source data 1. [file elife-66275-fig2-data1.xlsx]

## Sheet: Fig 2
Figure 2-Source Data 1
Panel E: Blood Glucose
Genotype	Sex	Age	Blood Glucose (mg/dL)
Control	Male	4-months	156
Control	Male	4-months	163
Control	Male	4-months	160
Control	Male	4-months	154
Control	Male	4-months	168
Fat Free	Male	4-months	284
Fat Free	Male	4-months	183
Fat Free	Male	4-months	178
Fat Free	Male	4-months	206
Fat Free	Male	4-months	206
Fat Free	Male	4-months	246
Control	Female	4-months	143
Control	Female	4-months	110
Control	Female	4-months	182
Control	Female	4-months	149
Control	Female	4-months	199
Control	Female	4-months	161
Control	Female	4-months	120
Control	Female	4-months	103
Fat Free	Female	4-months	183
Fat Free	Female	4-months	182
Fat Free	Female	4-months	180
Fat Free	Female	4-months	133
Fat Free	Female	4-months	181
Panel F: Tibia Length
Genotype	Sex	Age	Tibia Length (mm)
Control	Male	4-months	17.88
Control	Male	4-months	17.6
Control	Male	4-months	18.04
Control	Male	4-months	17.9
Control	Male	8-months	17.4
Control	Male	8-months	17.46
Control	Male	8-months	17.32
Control	Male	8-months	17.8
Control	Male	8-months	17.76
Fat Free	Male	4-months	15.86
Fat Free	Male	4-months	17.1
Fat Free	Male	4-months	17.06
Fat Free	Male	4-months	16.38
Fat Free	Male	4-months	16.74
Fat Free	Male	8-months	17.66
Fat Free	Male	8-months	17.24
Fat Free	Male	8-months	16.68
Fat Free	Male	8-months	17
Fat Free	Male	8-months	16.92
Fat Free	Male	8-months	17.08
Control	Female	4-months	22.2
Control	Female	4-months	15.4
Control	Female	4-months	21.3
Control	Female	4-months	21.2
Control	Female	4-months	20
Control	Female	4-months	19.9
Control	Female	4-months	24.2
Control	Female	4-months	21.3
Control	Female	8-months	29.5
Control	Female	8-months	22.7
Control	Female	8-months	27.1
Fat Free	Female	4-months	23.1
Fat Free	Female	4-months	24.4
Fat Free	Female	4-months	22.5
Fat Free	Female	4-months	22.4
Fat Free	Female	4-months	24.3
Fat Free	Female	8-months	29.6
Fat Free	Female	8-months	29.5
Fat Free	Female	8-months	27.5
Panel G: Body Mass
Genotype	Sex	Age	Body Mass (g)
Control	Male	4-months	27.3
Control	Male	4-months	28.5
Control	Male	4-months	25
Control	Male	4-months	29.2
Control	Male	4-months	31.9
Control	Male	8-months	39.2
Control	Male	8-months	29.4
Control	Male	8-months	35.2
Control	Male	8-months	36.7
Fat Free	Male	4-months	32.1
Fat Free	Male	4-months	29.9
Fat Free	Male	4-months	28
Fat Free	Male	4-months	26.5
Fat Free	Male	4-months	27.2
Fat Free	Male	4-months	29.4
Fat Free	Male	8-months	26.9
Fat Free	Male	8-months	31.6
Fat Free	Male	8-months	30.2
Fat Free	Male	8-months	28.3
Fat Free	Male	8-months	28.4
Control	Female	4-months	22.2
Control	Female	4-months	15.4
Control	Female	4-months	21.3
Control	Female	4-months	21.2
Control	Female	4-months	20
Control	Female	4-months	19.9
Control	Female	4-months	24.2
Control	Female	4-months	21.3
Control	Female	8-months	29.5
Control	Female	8-months	22.7
Control	Female	8-months	27.1
Fat Free	Female	4-months	23.1
Fat Free	Female	4-months	24.4
Fat Free	Female	4-months	22.5
Fat Free	Female	4-months	22.4
Fat Free	Female	4-months	24.3
Fat Free	Female	8-months	29.6
Fat Free	Female	8-months	29.5
Fat Free	Female	8-months	27.5
