# Supplementary material for: A bone-specific adipogenesis pathway in fat-free mice defines key origins and adaptations of bone marrow adipocytes with age and disease
Source: eLife. 2021 Aug 11;10:e66275. doi: 10.7554/eLife.66275 (PMC8412938; doi:10.7554/eLife.66275)
Supplement: Figure 3—figure supplement 1—source data 1. [file elife-66275-fig3-figsupp1-data1.xlsx]

## Sheet: Fig 3-figure supplement 1
Figure 3-figure supplement 1-Source Data 1
Panels B-H: Cortical Bone
Genotype	Sex	Age	Ct. Thickness (mm)	Ct. BVF (%)	Ct. Medullary Area (mm2)	Ct. Total Area (mm2)	Ct. Bone Area (mm2)	Ct. BMC (mgHA/ccm)	pMOI (mm4)
Control	Male	4-months	0.2169	0.589089	0.48132	1.1713	0.69	1066.7	0.17009
Control	Male	4-months	0.205	0.558629	0.53711	1.2168	0.67974	1054.09	0.17926
Control	Male	4-months	0.2144	0.588782	0.45526	1.1071	0.65184	1083.87	0.15103
Control	Male	4-months	0.2171	0.562635	0.57237	1.3087	0.73632	1057.68	0.21286
Control	Male	4-months	0.2283	0.587072	0.57842	1.4008	0.82237	1066	0.25088
Control	Male	8-months	0.2125	0.563457	0.65056	1.4903	0.83972	1106.84	0.10566
Control	Male	8-months	0.2004	0.561264	0.50806	1.1581	0.65	1091.34	0.10739
Control	Male	8-months	0.22	0.589485	0.59889	1.4589	0.86	1097.64	0.10652
Control	Male	8-months	0.2173	0.560101	0.68833	1.5647	0.87639	1112.53	0.27236
Fat Free	Male	4-months	0.2533	0.683797	0.35658	1.1276	0.77105	1081.41	0.17125
Fat Free	Male	4-months	0.2528	0.680501	0.34211	1.0708	0.72868	1067.75	0.15204
Fat Free	Male	4-months	0.2347	0.676359	0.31342	0.96842	0.655	1047	0.1248
Fat Free	Male	4-months	0.2101	0.616737	0.36763	0.95921	0.59158	1068.63	0.11748
Fat Free	Male	4-months	0.2328	0.672668	0.31579	0.96474	0.64895	1070.29	0.12116
Fat Free	Male	4-months	0.2289	0.695785	0.29605	0.97316	0.67711	1058.82	0.12488
Fat Free	Male	8-months	0.2036	0.678956	0.26611	0.82889	0.56278	1089.15	0.16391
Fat Free	Male	8-months	0.191	0.624672	0.3575	0.9525	0.595	1087.22	0.27303
Fat Free	Male	8-months	0.1778	0.545294	0.44472	0.97806	0.53333	1064.11	0.30076
Fat Free	Male	8-months	0.1828	0.591343	0.38028	0.93056	0.55028	1081.36	0.08996
Fat Free	Male	8-months	0.1955	0.610311	0.30861	0.79194	0.48333	1077.86	0.11192
Control	Female	4-months	0.186	0.549911	0.4412	0.98025	0.53905	1073.45	0.11248
Control	Female	4-months	0.1622	0.524726	0.37895	0.79733	0.41838	1048.75	0.07127
Control	Female	4-months	0.1673	0.512108	0.46821	0.95966	0.49145	1053.39	0.10249
Control	Female	4-months	0.1808	0.531474	0.48566	1.03657	0.55091	1078.96	0.12528
Control	Female	4-months	0.1803	0.548411	0.42532	0.94183	0.51651	1071.26	0.10228
Control	Female	4-months	0.18	0.555414	0.41322	0.92945	0.51623	1075.9	0.10089
Control	Female	4-months	0.1737	0.516628	0.51802	1.07168	0.55366	1036.14	0.13166
Control	Female	4-months	0.1769	0.523885	0.49554	1.0408	0.54526	1087.37	0.12299
Control	Female	8-months	0.2007	0.571768	0.46806	1.0931	0.625	1102.37	0.11978
Control	Female	8-months	0.2286	0.67327	0.29806	0.91222	0.61417	1127.24	0.11647
Control	Female	8-months	0.1852	0.559349	0.41972	0.9525	0.53278	1080.74	0.12002
Fat Free	Female	4-months	0.2373	0.708262	0.25289	0.86684	0.61395	1083.52	0.10094
Fat Free	Female	4-months	0.244	0.744245	0.21342	0.83447	0.62105	1084.65	0.09248
Fat Free	Female	4-months	0.244	0.694534	0.27684	0.90632	0.62947	1073.27	0.10853
Fat Free	Female	4-months	0.2414	0.729691	0.21895	0.81	0.59105	1070.03	0.08542
Fat Free	Female	4-months	0.2197	0.640856	0.32342	0.90053	0.57711	1058.56	0.10436
Fat Free	Female	8-months	0.2013	0.604353	0.39389	0.99556	0.60167	1093	0.09435
Fat Free	Female	8-months	0.1845	0.595791	0.40028	0.99028	0.59	1084.25	0.12002
Fat Free	Female	8-months	0.1904	0.763762	0.21222	0.89833	0.68611	1061.39	0.14221
