# Supplementary material for: A bone-specific adipogenesis pathway in fat-free mice defines key origins and adaptations of bone marrow adipocytes with age and disease
Source: eLife. 2021 Aug 11;10:e66275. doi: 10.7554/eLife.66275 (PMC8412938; doi:10.7554/eLife.66275)
Supplement: Figure 3—source data 1. [file elife-66275-fig3-data1.xlsx]

## Sheet: Fig 3
Figure 3-Source Data 1
Panels B-F: Trabecular Bone
Genotype	Sex	Age	BVF (%)	Tb. Number (1/mm)	Tb. Thickness (mm)	Tb. Spacing (mm)	Tb. BMD (mgHA/ccm)
Control	Male	4-months	0.1283	4.053	0.0576	0.2464	176.058
Control	Male	4-months	0.1859	4.5638	0.0651	0.2207	210.3
Control	Male	4-months	0.1584	4.6037	0.0583	0.2187	196.638
Control	Male	4-months	0.275	6.1294	0.0639	0.1576	257.853
Control	Male	4-months	0.3077	6.0423	0.0701	0.1573	278.259
Control	Male	8-months	0.2538	4.8616	0.0727	0.2044	243.2
Control	Male	8-months	0.1274	4.1552	0.0558	0.2486	173.5
Control	Male	8-months	0.2732	4.626	0.0777	0.2201	253.883
Control	Male	8-months	0.3167	5.2192	0.0783	0.1897	283.479
Fat Free	Male	4-months	0.2722	6.1711	0.0687	0.1481	266.261
Fat Free	Male	4-months	0.2739	6.6553	0.0638	0.1353	265.911
Fat Free	Male	4-months	0.2536	6.846	0.0586	0.1362	254.088
Fat Free	Male	4-months	0.2406	6.546	0.06	0.1433	245.418
Fat Free	Male	4-months	0.194	6.0012	0.0575	0.1567	223.962
Fat Free	Male	4-months	0.3543	7.2479	0.0691	0.1202	306.633
Fat Free	Male	8-months	0.2732	6.0796	0.0654	0.1619	260.45
Fat Free	Male	8-months	0.223	4.4259	0.0601	0.2358	217.719
Fat Free	Male	8-months	0.1705	5.6138	0.0564	0.1794	215.092
Fat Free	Male	8-months	0.224	5.5676	0.0584	0.1807	228.052
Fat Free	Male	8-months	0.1272	4.6119	0.0522	0.2203	186.196
Control	Female	4-months	0.0996	3.3	0.0522	0.3055	162.746
Control	Female	4-months	0.0586	2.8951	0.049	0.3463	127.804
Control	Female	4-months	0.0731	2.9367	0.051	0.3455	144.881
Control	Female	4-months	0.0685	2.6372	0.0519	0.3865	141.29
Control	Female	4-months	0.1002	2.4023	0.0537	0.4278	159.769
Control	Female	4-months	0.103	3.79	0.0515	0.2658	165.461
Control	Female	4-months	0.1054	3.6774	0.052	0.2753	164.498
Control	Female	4-months	0.0832	2.8855	0.0538	0.3509	149.873
Control	Female	8-months	0.0827	2.9459	0.0598	0.3458	137.599
Control	Female	8-months	0.1136	3.0112	0.0598	0.3381	161.241
Control	Female	8-months	0.1005	2.962	0.0642	0.3434	144.867
Fat Free	Female	4-months	0.1762	5.5956	0.0578	0.173	217.831
Fat Free	Female	4-months	0.2986	6.2068	0.0722	0.1492	280.448
Fat Free	Female	4-months	0.2713	6.1403	0.0691	0.1482	268.976
Fat Free	Female	4-months	0.3313	6.7646	0.0707	0.131	297.788
Fat Free	Female	4-months	0.283	6.8226	0.0628	0.1321	271.69
Fat Free	Female	8-months	0.6215	7.9803	0.1055	0.1244	376.472
Fat Free	Female	8-months	0.3061	4.7333	0.0734	0.2261	266.317
Fat Free	Female	8-months	0.306	5.2528	0.0794	0.209	259.837
