# Supplementary material for: A bone-specific adipogenesis pathway in fat-free mice defines key origins and adaptations of bone marrow adipocytes with age and disease
Source: eLife. 2021 Aug 11;10:e66275. doi: 10.7554/eLife.66275 (PMC8412938; doi:10.7554/eLife.66275)
Supplement: Figure 4—source data 1. [file elife-66275-fig4-data1.xlsx]

## Sheet: Fig 4
Figure 4-Source Data 1
Panels C-E: BMAT Volume
Genotype	Sex	Age	BMAT/Marrow Volume (%)	Proximal Tibial BMAT (mm3)	Distal Tibial BMAT (mm3)
Control	Male	4-months	2.15	0.7259	0.911
Control	Male	4-months	2.29	0.0516	0.5153
Control	Male	4-months	1.02	0.2492	0.7938
Control	Male	4-months	21.58	0.1784	0.3206
Control	Male	4-months	45.31	0.0779	0.1435
Control	Male	8-months	10.86	0.2175	1.46
Control	Male	8-months	30.21	1.7886	2.2927
Control	Male	8-months	5.83	0.0338	0.8106
Control	Male	8-months	8.73	0.2077	1.1304
Fat Free	Male	4-months	8.58	0.1252	0.0438
Fat Free	Male	4-months	10.48	0.0352	0.0145
Fat Free	Male	4-months	11.07	0.0847	0.0675
Fat Free	Male	4-months	11.93	0.0157	0.273
Fat Free	Male	4-months	5.9	0.0888	0.0247
Fat Free	Male	4-months	0.83	0.1476	0.0753
Fat Free	Male	8-months	5.25	0.3649	0.0075
Fat Free	Male	8-months	4.18	0.3815	0.0231
Fat Free	Male	8-months	15.38	0.9949	0.4449
Fat Free	Male	8-months	16.13	1.0286	0.3287
Fat Free	Male	8-months	1.28	0.1068	0.0045
Control	Female	4-months	2.3	0.713	1.2956
Control	Female	4-months	0.71	1.8463	1.8221
Control	Female	4-months	2.32	0.1575	0.6807
Control	Female	4-months	3.71	0.3579	0.7136
Control	Female	4-months	1.7	0.2986	0.7146
Control	Female	4-months	3.56	0.2819	0.7786
Control	Female	4-months	15.43	0.2674	0.3922
Control	Female	4-months	5.36	0.0225	0.0716
Control	Female	8-months	41.71	3.1056	2.2884
Control	Female	8-months	44.93	2.9801	1.3019
Control	Female	8-months	38	2.2652	1.9457
Fat Free	Female	4-months	10.28	0.0127	0.0022
Fat Free	Female	4-months	4.48	0.1101	0.003
Fat Free	Female	4-months	2.08	0.0838	0.0122
Fat Free	Female	4-months	0.29	0.0598	0.0254
Fat Free	Female	4-months	2.61	0.0311	0.021
Fat Free	Female	8-months	20.1	1.4684	0.0833
Fat Free	Female	8-months	25.21	1.6061	0.2101
Fat Free	Female	8-months	18.46	1.0614	0.222
