# Supplementary material for: A bone-specific adipogenesis pathway in fat-free mice defines key origins and adaptations of bone marrow adipocytes with age and disease
Source: eLife. 2021 Aug 11;10:e66275. doi: 10.7554/eLife.66275 (PMC8412938; doi:10.7554/eLife.66275)
Supplement: Figure 5—source data 1. [file elife-66275-fig5-data1.xlsx]

## Sheet: Fig 5
Figure 5-Source Data 1
Panel D: BMAd Size Distribution (%) Histogram
Genotype	Sex	Age	Area (μm2): 0	250	500	750	1000	1250	1500	1750	2000	2250	2500	2750	3000	3250	3500	3750	4000
Control	Male	8-months	0	15.9292	19.469	11.5044	23.0088	14.1593	5.30973	5.30973	3.53982	0.884956	0.884956	0	0	0	0	0	0
Control	Male	8-months	0	18.3099	23.9437	20.6573	13.1455	10.3286	6.10329	4.69484	1.87793	0.469484	0	0.469484	0	0	0	0	0
Control	Male	8-months	0	24.6154	25.3846	12.3077	14.6154	12.3077	6.15385	2.30769	1.53846	0.769231	0	0	0	0	0	0	0
Control	Male	8-months	0	17.3913	23.1884	18.8406	20.2899	7.97101	5.7971	2.89855	1.44928	1.44928	0.724638	0	0	0	0	0	0
Fat Free	Male	8-months	0	28.2258	21.7742	7.25806	10.4839	10.4839	9.67742	6.45161	4.03226	0.806452	0.806452	0	0	0	0	0	0
Fat Free	Male	8-months	0	26.2136	11.6505	10.6796	11.6505	12.6214	7.76699	7.76699	5.82524	0.970874	0.970874	0.970874	1.94175	0.970874	0	0	0
Fat Free	Male	8-months	0	18.8841	13.3047	13.7339	14.5923	12.8755	11.588	4.29185	4.72103	2.14592	1.28755	1.28755	0.858369	0	0.429185	0	0
Fat Free	Male	8-months	0	16.9492	19.774	18.3616	11.2994	12.1469	7.9096	7.34463	2.54237	0.564972	1.41243	0.564972	0.282486	0.282486	0.282486	0.282486	0
Fat Free	Male	8-months	0	41.3462	12.5	7.69231	6.73077	8.65385	3.84615	6.73077	6.73077	1.92308	0.961538	1.92308	0	0	0.961538	0	0
Control	Female	8-months	0	23.6585	26.3415	17.0732	14.3902	9.02439	5.12195	2.92683	0.731707	0.487805	0.243902	0	0	0	0	0	0
Control	Female	8-months	0	22.4852	23.9645	19.5266	14.645	8.57988	3.5503	3.40237	1.92308	0.443787	0.443787	0.295858	0.147929	0.147929	0	0.443787	0
Control	Female	8-months	0	26	27	21	10.5	8	4.5	0.75	1.75	0	0.25	0.25	0	0	0	0	0
Fat Free	Female	8-months	0	14.5631	15.9223	10.2913	15.9223	9.90291	11.2621	8.54369	5.63107	4.46602	1.94175	0.970874	0.582524	0	0	0	0
Fat Free	Female	8-months	0	20.3774	18.3019	17.1698	14.1509	9.62264	5.84906	3.77358	4.5283	1.69811	1.13208	1.69811	0.566038	0.377358	0.754717	0	0
Fat Free	Female	8-months	0	13.4545	19.2727	13.4545	12	10.9091	9.09091	5.45455	5.81818	2.90909	2.90909	2.18182	0.363636	0.727273	0.727273	0.727273	0
