# Supplementary material for: A bone-specific adipogenesis pathway in fat-free mice defines key origins and adaptations of bone marrow adipocytes with age and disease
Source: eLife. 2021 Aug 11;10:e66275. doi: 10.7554/eLife.66275 (PMC8412938; doi:10.7554/eLife.66275)
Supplement: Figure 6—source data 1. [file elife-66275-fig6-data1.xlsx]

## Sheet: Fig 6
Figure 6-Source Data 1
Panels A, B, D, F: Cold Challenge
Genotype	Sex	Age	Housing Temperature (°C)	Tibia Tb. BVF (%)	Femur Tb. BVF (%)	Tibia Ct. Thickness (mm)	Femur Ct. Thickness (mm)	Proximal Tibial BMAT (mm3)	Distal Tibial BMAT (mm3)	Femur Metaphysis BMAT (mm3)	Femur Diaphyseal BMAT (mm3)
Control	Male	3 to 4-months	30	0.1414	0.1317	0.215	0.1885	0.7899	1.2722	0.3554	0.3887
Control	Male	3 to 4-months	30	0.2165	0.2232	0.2128	0.2026	0.1521	0.651	0.024	0.0341
Control	Male	3 to 4-months	30	0.1642	0.1862	0.2176	0.202	0.6247	1.2796	0.1292	0.1447
Control	Male	3 to 4-months	30	0.2467	0.2654	0.213	0.1971	0.4635	0.614	0.0204	0.0298
Control	Male	3 to 4-months	22	0.108	0.0804	0.1782	0.1723	0.0036	1.4052	0.0007	0.0023
Control	Male	3 to 4-months	22	0.0976	0.0727	0.204	0.1633	0.0586	1.4434	0.0015	0.0024
Control	Male	3 to 4-months	22	0.1054	0.0862	0.2035	0.1684	0.1156	1.5052	0.0462	0.0534
Control	Male	3 to 4-months	22	0.1058	0.1029	0.1928	0.1719	0.2347	1.3291	0.0013	0.0052
Control	Male	3 to 4-months	22	0.095	0.0947	0.1978	0.1822	0.0455	1.4311	0.0118	0.0167
Fat Free	Male	3 to 4-months	30	0.2921	0.2482	0.2164	0.1999	0.0592	0.0187	0.013	0.3628
Fat Free	Male	3 to 4-months	30	0.397	0.3936	0.2301	0.185	0.1752	0.0924	0.0033	0.1068
Fat Free	Male	3 to 4-months	30	0.341	0.3558	0.2185	0.1966	0.0634	0.0537	0.0216	0.4203
Fat Free	Male	3 to 4-months	30	0.2184	0.2614	0.216	0.2025	0.6813	0.0252	0.1488	0.2152
Fat Free	Male	3 to 4-months	30	0.4001	0.3656	0.2225	0.1817	0.066	0.0568	0.0034	0.01
Fat Free	Male	3 to 4-months	22	0.2003	0.2139	0.2177	0.2181	0.4099	0.1167	0.0137	0.0228
Fat Free	Male	3 to 4-months	22	0.2132	0.1852	0.2207	0.1991	0.0024	0.018	0.0023	0.0171
Fat Free	Male	3 to 4-months	22	0.1936	0.1874	0.1986	0.1937	0.4273	0.6965	0.1074	0.7951
Fat Free	Male	3 to 4-months	22	0.2469	0.1949	0.211	0.2081	0.1254	0.0925	0.0311	0.5783
Fat Free	Male	3 to 4-months	22	0.2463	0.2566	0.2259	0.2179	0.1119	0.303	0.0246	0.1609
