# Supplementary material for: A bone-specific adipogenesis pathway in fat-free mice defines key origins and adaptations of bone marrow adipocytes with age and disease
Source: eLife. 2021 Aug 11;10:e66275. doi: 10.7554/eLife.66275 (PMC8412938; doi:10.7554/eLife.66275)
Supplement: Figure 7—source data 1. [file elife-66275-fig7-data1.xlsx]

## Sheet: Fig 7
Figure 7-Source Data 1
Panel A: Serum Glycerol
Genotype	Sex	Age	Time point	Day 1 Serum Glycerol (mg/mL)	Day 7 Serum Glycerol (mg/mL)
Control	Male	7.5-months	Baseline	0.135638	0.124511
Control	Male	7.5-months	Baseline	0.129014	0.166292
Control	Male	7.5-months	Baseline	0.232929	0.202806
Control	Male	7.5-months	Baseline	0.218147	0.138732
Control	Male	7.5-months	Baseline	0.141647	0.386014
Control	Male	7.5-months	Baseline	0.984266	0.691097
Control	Male	7.5-months	30-min	0.519895	0.660296
Control	Male	7.5-months	30-min	0.519895	0.616143
Control	Male	7.5-months	30-min	0.825315	0.80646
Control	Male	7.5-months	30-min	0.688324	0.578624
Control	Male	7.5-months	30-min	0.640432	0.687636
Control	Male	7.5-months	30-min	0.78767	0.647498
Fat Free	Male	7.5-months	Baseline	0.127158	0.177134
Fat Free	Male	7.5-months	Baseline	0.224817	0.368829
Fat Free	Male	7.5-months	Baseline	0.158229	0.305435
Fat Free	Male	7.5-months	Baseline	0.0897377	0.0877359
Fat Free	Male	7.5-months	Baseline	0.102516	0.0945256
Fat Free	Male	7.5-months	30-min	0.104273	0.14139
Fat Free	Male	7.5-months	30-min	0.108464	0.270105
Fat Free	Male	7.5-months	30-min	0.104189	0.171491
Fat Free	Male	7.5-months	30-min	0.138747	0.085282
Fat Free	Male	7.5-months	30-min	0.125346	0.0631185
Panel B: Average BMad size (um2)
Genotype	Sex	Age	Treatment	Average BMad Size (um2)
Control	Male	8-months	-	923.225
Control	Male	8-months	-	805.455
Control	Male	8-months	-	755.218
Control	Male	8-months	-	824.74
Control	Male	8-months	CL316	672.218
Control	Male	8-months	CL316	663.238
Control	Male	8-months	CL316	655.078
Control	Male	8-months	CL316	484.355
Control	Male	8-months	CL316	432.793
Control	Male	8-months	CL316	742.785
Fat Free	Male	8-months	-	856.541
Fat Free	Male	8-months	-	1005.88
Fat Free	Male	8-months	-	1030.94
Fat Free	Male	8-months	-	945.364
Fat Free	Male	8-months	-	862.831
Fat Free	Male	8-months	CL316	1303.62
Fat Free	Male	8-months	CL316	942.592
Fat Free	Male	8-months	CL316	1101.06
Fat Free	Male	8-months	CL316	955.532
Fat Free	Male	8-months	CL316	1163.05
Panel D: BMAe Gene expression (Normalized to Control)
Genotype	Representative of pooled sample number (# of mice)	Adrb2	Adrb3	Pnpla2	Lipe	Mgll
Control	9	Data not available	2.61503	1.79738	Data not available	1.04535
Control	12	0.800949	0.25539	0.763994	1.24066	0.890314
Control	8	1.29941	0.426988	0.498795	0.638851	0.526032
Control	8	Data not available	0.869919	0.957102	Data not available	1.58814
Fat Free	8	0.674429	0	0.79642	1.25272	0.298444
Fat Free	12	0.787822	0.091936	0.754995	1.15817	0.485557
*Data not available. When indicated, the RNA for these samples was depleted and unavailable to analyze the listed genes.
