# Supplementary material for: A bone-specific adipogenesis pathway in fat-free mice defines key origins and adaptations of bone marrow adipocytes with age and disease
Source: eLife. 2021 Aug 11;10:e66275. doi: 10.7554/eLife.66275 (PMC8412938; doi:10.7554/eLife.66275)
Supplement: Figure 8—figure supplement 2—source data 1. [file elife-66275-fig8-figsupp2-data1.xlsx]

## Sheet: Fig 8-figure supplement 2
Figure 8-figure supplement 2-Source Data 1
Panels B-E: Fat Transplant Bone
Genotype	Sex	Age	Treatment	Ct. Thickness (mm)	Ct. Medullary Area (mm2)	Tb. BVF (%)	Tb. Number (mm)
Control	Male	3 to 4-months	Sham	0.1298	0.64205	0.0527	3.6243
Control	Male	3 to 4-months	Sham	0.2048	0.56379	0.1044	3.8667
Control	Male	3 to 4-months	Sham	0.2277	0.54754	0.219	5.3456
Control	Male	3 to 4-months	Sham	0.21	0.51248	0.1703	4.7226
Control	Male	3 to 4-months	Fat Transplant	0.1884	0.50298	0.1158	4.2207
Control	Male	3 to 4-months	Fat Transplant	0.207	0.57876	0.131	3.9629
Control	Male	3 to 4-months	Fat Transplant	0.1849	0.59013	0.0866	3.7407
Control	Male	3 to 4-months	Fat Transplant	0.218	0.55678	0.183	4.6892
Fat Free	Male	3 to 4-months	Sham	0.2195	0.34729	0.2693	6.2577
Fat Free	Male	3 to 4-months	Sham	0.2172	0.30379	0.27	5.7951
Fat Free	Male	3 to 4-months	Sham	0.2167	0.25956	0.076	3.0676
Fat Free	Male	3 to 4-months	Sham	0.2121	0.32023	0.27	5.7951
Fat Free	Male	3 to 4-months	Sham	0.2285	0.25476	0.4576	6.9374
Fat Free	Male	3 to 4-months	Sham	0.2339	0.25261	0.3492	7.4342
Fat Free	Male	3 to 4-months	Fat Transplant	0.2437	0.27735	0.1576	5.2712
Fat Free	Male	3 to 4-months	Fat Transplant	0.2253	0.33586	0.242	5.7877
Fat Free	Male	3 to 4-months	Fat Transplant	0.2284	0.38211	0.1754	5.1811
Fat Free	Male	3 to 4-months	Fat Transplant	0.2464	0.43172	0.281	5.8645
Fat Free	Male	3 to 4-months	Fat Transplant	0.2308	0.33141	0.1658	5.4848
Control	Female	3 to 4-months	Sham	0.1841	0.44901	0.0705	2.7589
Control	Female	3 to 4-months	Sham	0.1815	0.40286	0.0808	3.127
Control	Female	3 to 4-months	Sham	0.1897	0.35512	0.0744	2.6325
Control	Female	3 to 4-months	Sham	0.1855	0.43476	0.071	2.6711
Control	Female	3 to 4-months	Sham	0.1745	0.44171	0.076	3.0676
Control	Female	3 to 4-months	Fat Transplant	0.177	0.43307	0.1031	4.006
Control	Female	3 to 4-months	Fat Transplant	0.1817	0.43944	0.0804	3.0914
Control	Female	3 to 4-months	Fat Transplant	0.1744	0.42316	0.0574	2.555
Control	Female	3 to 4-months	Fat Transplant	0.1782	0.44954	0.0569	2.6452
Control	Female	3 to 4-months	Fat Transplant	0.1702	0.53175	0.0847	3.3666
Fat Free	Female	3 to 4-months	Sham	0.2353	0.25474	0.1993	5.3244
Fat Free	Female	3 to 4-months	Sham	0.2327	0.20139	0.2665	6.3195
Fat Free	Female	3 to 4-months	Sham	0.2266	0.2856	0.2403	6.6432
Fat Free	Female	3 to 4-months	Sham	0.2132	0.22465	0.4435	7.2344
Fat Free	Female	3 to 4-months	Sham	0.2003	0.34967	0.1217	4.2034
Fat Free	Female	3 to 4-months	Sham	0.2263	0.26937	0.2118	5.6483
Fat Free	Female	3 to 4-months	Sham	0.2355	0.22023	0.1618	4.3661
Fat Free	Female	3 to 4-months	Fat Transplant	0.2406	0.22141	0.2671	6.0986
Fat Free	Female	3 to 4-months	Fat Transplant	0.2459	0.21933	0.266	5.4628
Fat Free	Female	3 to 4-months	Fat Transplant	0.2405	0.26499	0.1414	4.0657
Fat Free	Female	3 to 4-months	Fat Transplant	0.2481	0.24489	0.1605	4.141
