# Supplementary material for: A bone-specific adipogenesis pathway in fat-free mice defines key origins and adaptations of bone marrow adipocytes with age and disease
Source: eLife. 2021 Aug 11;10:e66275. doi: 10.7554/eLife.66275 (PMC8412938; doi:10.7554/eLife.66275)
Supplement: Figure 8—figure supplement 3—source data 1. [file elife-66275-fig8-figsupp3-data1.xlsx]

## Sheet: Fig 8-figure supplement 3
Figure 8-figure supplement 3-Source Data 1
Panels A-C: Fat Transplant Adipose Tissue Masses
Genotype	Sex	Age	Treatment	BAT Mass (g)	iWAT Mass (g)	gWAT Mass (g)
Control	Male	3 to 4-months	Sham	0.1	0.189	0.12
Control	Male	3 to 4-months	Sham	0.208	0.32	0.456
Control	Male	3 to 4-months	Sham	0.2	0.244	0.431
Control	Male	3 to 4-months	Sham	0.182	0.354	0.62
Control	Male	3 to 4-months	Fat Transplant	0.163	0.237	0.489
Control	Male	3 to 4-months	Fat Transplant	0.149	0.334	0.564
Control	Male	3 to 4-months	Fat Transplant	0.154	0.255	0.458
Control	Male	3 to 4-months	Fat Transplant	0.187	0.321	0.532
Fat Free	Male	3 to 4-months	Sham	0	0	0
Fat Free	Male	3 to 4-months	Sham	0	0	0
Fat Free	Male	3 to 4-months	Sham	0	0	0
Fat Free	Male	3 to 4-months	Sham	0	0	0
Fat Free	Male	3 to 4-months	Sham	0	0	0
Fat Free	Male	3 to 4-months	Sham	0	0	0
Fat Free	Male	3 to 4-months	Fat Transplant	0	0	0
Fat Free	Male	3 to 4-months	Fat Transplant	0	0	0
Fat Free	Male	3 to 4-months	Fat Transplant	0	0	0
Fat Free	Male	3 to 4-months	Fat Transplant	0	0	0
Fat Free	Male	3 to 4-months	Fat Transplant	0	0	0
Control	Female	3 to 4-months	Sham	0.157	0.364	0.286
Control	Female	3 to 4-months	Sham	0.09	0.276	0.22
Control	Female	3 to 4-months	Sham	0.128	0.347	0.269
Control	Female	3 to 4-months	Sham	0.134	0.305	0.248
Control	Female	3 to 4-months	Sham	0.143	0.34	0.394
Control	Female	3 to 4-months	Fat Transplant	0.112	0.473	0.416
Control	Female	3 to 4-months	Fat Transplant	0.115	0.338	0.339
Control	Female	3 to 4-months	Fat Transplant	0.099	0.243	0.172
Control	Female	3 to 4-months	Fat Transplant	0.122	0.403	0.404
Control	Female	3 to 4-months	Fat Transplant	0.088	0.36	0.335
Fat Free	Female	3 to 4-months	Sham	0	0	0
Fat Free	Female	3 to 4-months	Sham	0	0	0
Fat Free	Female	3 to 4-months	Sham	0	0	0
Fat Free	Female	3 to 4-months	Sham	0	0	0
Fat Free	Female	3 to 4-months	Sham	0	0	0
Fat Free	Female	3 to 4-months	Sham	0	0	0
Fat Free	Female	3 to 4-months	Sham	0	0	0
Fat Free	Female	3 to 4-months	Fat Transplant	0	0	0
Fat Free	Female	3 to 4-months	Fat Transplant	0	0	0
Fat Free	Female	3 to 4-months	Fat Transplant	0	0	0
Fat Free	Female	3 to 4-months	Fat Transplant	0	0	0
