# Supplementary material for: A bone-specific adipogenesis pathway in fat-free mice defines key origins and adaptations of bone marrow adipocytes with age and disease
Source: eLife. 2021 Aug 11;10:e66275. doi: 10.7554/eLife.66275 (PMC8412938; doi:10.7554/eLife.66275)
Supplement: Figure 8—source data 1. [file elife-66275-fig8-data1.xlsx]

## Sheet: Fig 8
Figure 8-Source Data 1
Panels A-D, H: Fat Transplant				Body Mass (g):							Blood glucose (mg/dL):
Genotype	Sex	Age	Treatment	Weeks: 0	2	4	6	8	10	12	Weeks: 1	2	4	8	12	iWAT Transplant Mass (g)	Liver Mass (g)	Tibial BMAT volume (mm3)
Control	Male	3 to 4-months	Sham	16.5	21.3	19.8	19.8	18.6	18.4	19.3	148	Not Available	158	156	133	0	1.092	0.0019
Control	Male	3 to 4-months	Sham	16.4	18.9	23.9	25.8	26.8	27.3	27.4	182	Not Available	153	116	171	0	1.17	0.2148
Control	Male	3 to 4-months	Sham	14.4	20.6	23.1	25.2	25.8	27	26.2	133	Not Available	162	160	164	0	1.326	0.438
Control	Male	3 to 4-months	Sham	14.8	21.6	23.8	26.3	27.6	28.7	29.3	175	Not Available	191	152	138	0	1.228	0.6932
Control	Male	3 to 4-months	Fat Transplant	19.6	21.4	22.6	23	24.3	25.9	27.2	186	Not Available	140	179	128	0.091	1.168	1.1491
Control	Male	3 to 4-months	Fat Transplant	19	20.9	23.5	24.8	26.7	28.1	28.9	226	Not Available	200	170	156	0.137	1.208	1.0304
Control	Male	3 to 4-months	Fat Transplant	18.7	21.4	24.3	24.2	24.9	26.9	26.8	191	Not Available	183	144	136	0.091	1.105	0.8854
Control	Male	3 to 4-months	Fat Transplant	15.7	20.7	23.2	25.5	26.2	27.6	28.2	156	Not Available	154	152	173	0.102	1.398	1.1223
Fat Free	Male	3 to 4-months	Sham	19.3	22.2	24.2	25.4	26.6	28.1	27.6	431	Not Available	364	230	157	0	4.454	0.4524
Fat Free	Male	3 to 4-months	Sham	13.5	17.7	18.7	17.4	18	22.8	25.8	287	Not Available	187	372	211	0	3.381	0.5636
Fat Free	Male	3 to 4-months	Sham	13	18.7	20.2	20.9	21.2	23.8	22.5	344	Not Available	289	196	144	0	3.442	0.0124
Fat Free	Male	3 to 4-months	Sham	15.3	19.6	22.4	24.3	25.4	25.3	26.2	194	Not Available	287	406	174	0	3.854	0.1228
Fat Free	Male	3 to 4-months	Sham	8.9	17.5	21.5	23.9	25.9	27.3	27.1	291	Not Available	272	290	199	0	4.334	0.0412
Fat Free	Male	3 to 4-months	Sham	10.7	19.1	22.4	24.6	25.5	26.2	27	206	Not Available	301	178	344	0	4.124	0.0528
Fat Free	Male	3 to 4-months	Fat Transplant	12.1	17.7	22	22.5	24.4	24.9	25.9	251	Not Available	157	202	206	0.693	1.889	0.0046
Fat Free	Male	3 to 4-months	Fat Transplant	13.2	21.1	22.8	25.5	28.1	28.8	29.9	223	Not Available	194	177	197	0.587	1.764	0.0007
Fat Free	Male	3 to 4-months	Fat Transplant	16.6	21.1	23.9	25	26.3	27	27.9	175	Not Available	212	173	164	0.576	1.963	0.0011
Fat Free	Male	3 to 4-months	Fat Transplant	16.9	22	25.4	27.5	28.2	29.2	29.8	198	Not Available	164	196	167	0.488	2.197	0.0058
Fat Free	Male	3 to 4-months	Fat Transplant	14.3	20.2	21.8	23.6	25	26.1	27.1	218	Not Available	212	156	162	0.3	2.721	0.0279
Control	Female	3 to 4-months	Sham	16.3	17.9	20.3	20	21.2	21.2	21.5	170	181	159	145	128	0	0.909	1.0416
Control	Female	3 to 4-months	Sham	13.7	15.6	16.6	18	18.8	19.8	20.4	216	192	152	170	129	0	0.838	0.64
Control	Female	3 to 4-months	Sham	10.8	15.9	16.9	18.2	18.7	19.4	19.2	150	129	158	115	134	0	0.716	0.8351
Control	Female	3 to 4-months	Sham	12	17	18.5	19.4	21	20.6	21.2	204	119	106	165	125	0	0.866	0.732
Control	Female	3 to 4-months	Sham	11.4	15.7	17	18.5	19.3	19.9	20.1	144	130	168	133	133	0	0.769	1.4906
Control	Female	3 to 4-months	Fat Transplant	12.7	16.9	18.4	19.5	20.6	21	22.7	129	190	118	151	124	0.043	0.732	1.2472
Control	Female	3 to 4-months	Fat Transplant	13.3	17.7	19.9	20.2	20.8	21.9	22	137	184	155	126	136	0.05	0.984	1.1495
Control	Female	3 to 4-months	Fat Transplant	13.2	16.9	18.1	18.8	19.7	18.3	20.4	133	140	154	141	151	0.074	1.095	0.0161
Control	Female	3 to 4-months	Fat Transplant	11.3	17.2	18.3	19.6	20.4	21.7	21.9	179	170	124	151	141	0.024	0.885	0.512
Control	Female	3 to 4-months	Fat Transplant	13.8	18	19.8	21.4	21.5	22	22.2	112	135	135	124	113	0.134	0.705	0.5357
Fat Free	Female	3 to 4-months	Sham	16.3	19	20.9	22.2	22.5	23.3	24.1	293	203	160	181	178	0	4.368	0.2938
Fat Free	Female	3 to 4-months	Sham	15.3	18.4	20.2	22.4	22.5	23.7	24.2	272	304	139	155	193	0	4.148	0.0266
Fat Free	Female	3 to 4-months	Sham	17	20.4	22.6	24.8	24.7	26.3	26.4	313	207	175	194	164	0	4.64	0.0295
Fat Free	Female	3 to 4-months	Sham	8.6	15.3	18	19.9	21.7	22.3	23.4	164	171	298	406	241	0	5.515	0.0415
Fat Free	Female	3 to 4-months	Sham	17.4	18.8	19.6	20.2	21	21.5	22.1	191	207	211	180	222	0	3.204	1.7209
Fat Free	Female	3 to 4-months	Sham	15.3	19.2	20.6	20.9	21.8	21.8	22	225	164	210	198	243	0	3.786	0.0279
Fat Free	Female	3 to 4-months	Sham	14.5	20.1	21.6	22.8	23.7	23.4	23	238	229	285	163	149	0	4.229	2.9967
Fat Free	Female	3 to 4-months	Fat Transplant	14.7	16.8	17.4	17.6	18	18.7	19.7	212	148	136	142	128	0.702	1.21	0.0119
Fat Free	Female	3 to 4-months	Fat Transplant	9.3	15	17.4	17.5	18.2	18.6	19.2	181	210	162	167	132	0.62	1.128	0.0073
Fat Free	Female	3 to 4-months	Fat Transplant	9.7	16.4	17	17.9	18.9	19.5	20.1	171	214	136	165	176	0.721	1.275	0.0037
Fat Free	Female	3 to 4-months	Fat Transplant	14.8	18.1	18.9	19.3	19.5	20.3	21.8	246	199	133	144	128	0.642	1.541	0.1068
Panel E: 4-weeks Serum TG
Genotype	Sex	Treatment	Serum TG (mg/dL)
Control	Male	Sham	82.43
Control	Male	Sham	33.37
Control	Male	Sham	45.38
Control	Male	Sham	22.36
Control	Male	Fat Transplant	58.4
Control	Male	Fat Transplant	69.75
Control	Male	Fat Transplant	97.78
Control	Male	Fat Transplant	39.38
Fat Free	Male	Sham	186.54
Fat Free	Male	Sham	199.56
Fat Free	Male	Sham	114.46
Fat Free	Male	Sham	272.31
Fat Free	Male	Sham	112.79
Fat Free	Male	Sham	88.1
Fat Free	Male	Sham	220.25
Fat Free	Male	Fat Transplant	63.07
Fat Free	Male	Fat Transplant	46.05
Fat Free	Male	Fat Transplant	84.43
Fat Free	Male	Fat Transplant	37.38
Fat Free	Male	Fat Transplant	27.03
Control	Female	Sham	14.68
Control	Female	Sham	57.06
Control	Female	Sham	32.7
Control	Female	Sham	44.38
Control	Female	Sham	35.37
Control	Female	Fat Transplant	17.02
Control	Female	Fat Transplant	58.07
Control	Female	Fat Transplant	39.04
Control	Female	Fat Transplant	33.7
Control	Female	Fat Transplant	25.03
Fat Free	Female	Sham	128.81
Fat Free	Female	Sham	145.83
Fat Free	Female	Sham	40.05
Fat Free	Female	Sham	136.49
Fat Free	Female	Sham	199.22
Fat Free	Female	Sham	125.14
Fat Free	Female	Sham	176.87
Fat Free	Female	Fat Transplant	91.1
Fat Free	Female	Fat Transplant	51.73
Fat Free	Female	Fat Transplant	71.75
Fat Free	Female	Fat Transplant	93.44
Fat Free	Female	Fat Transplant	35.71
