# Supplementary material for: A bone-specific adipogenesis pathway in fat-free mice defines key origins and adaptations of bone marrow adipocytes with age and disease
Source: eLife. 2021 Aug 11;10:e66275. doi: 10.7554/eLife.66275 (PMC8412938; doi:10.7554/eLife.66275)
Supplement: Figure 9—source data 1. [file elife-66275-fig9-data1.xlsx]

## Sheet: Fig 9
Figure 9-Source Data 1
Panel B: % Total BMAd
Bone	GFP	RFP	Mixed
Femur	0	91.9	8.1
Femur	34.5	0	65.5
Femur	0	28.6	71.4
Femur	1.6	85.3	13.2
Femur	5.3	57.9	36.8
Femur	0	100	0
Femur	0	25	75
Tibia	22.2	29.6	48.1
Tibia	0	25	75
Tibia	74.9	5.9	19.2
Tibia	0	90.3	9.7
Tibia	26.7	21.4	51.9
Tibia	0	72.7	27.3
Panel C: CFU/million cells
Cre-/DTA+/mTmG+	Cre+/DTA+/mTmG+
34	1
6	0
21	2
29	0
5	9
2	0
0	0
13	1
	0
	0
	3
	0
	0
Panels E and F: BMAe Gene expression (Normalized to Control)
Genotype	Representative of pooled sample number (# of mice)	Adipoq	Cxcl12	Cfd	Retn	Ppary	Cebpa	CD36	Alpl	Dph1	Dph2	Dph3	Dph4	Dph5	Dph6	Dph7
Control	9	3.18692	3.1756	Data not available	Data not available	2.7944	1.31556	Data not available	2.53378	1.46929	Data not available	Data not available	Data not available	Data not available	Data not available	Data not available
Control	12	0.211002	0.11522	1.0896	1.42159	0.197406	1.30354	1.16919	0.375183	0.962192	1.15426	0.966295	1.04249	1.06017	1.05219	1.14205
Control	8	0.242938	0.298595	0.86536	0.368007	0.196747	0.783024	0.745418	0.400221	0.631522	0.768614	1.05056	0.93627	0.909751	0.921719	0.786927
Control	8	0.480189	0.581251	Data not available	Data not available	0.988716	0.407072	Data not available	0.813039	0.896793	Data not available	Data not available	Data not available	Data not available	Data not available	Data not available
Fat Free	8	0.104798	0.134871	0.062192	0.040825	0.207418	0.738239	1.30331	1.35836	1.07725	1.22857	1.02612	1.05829	1.25307	1.22176	1.48382
Fat Free	12	0.073967	0.132678	0.057441	0.082154	0.214646	0.82898	1.34804	1.50477	1.03954	1.2788	0.779171	1.12487	1.03285	1.24546	1.23565
*Data not available. When indicated, the RNA for these samples was depleted and unavailable to analyze the listed genes.
